# Supplementary material for: Assembly of the Tripartite and RNA Condensates of the Respiratory Syncytial Virus Factory Proteins In Vitro: Role of the Transcription Antiterminator M2-1
Source: MDPI journal article supplement (doi:10.3390/v15061329), 2023-06-06
Supplement: s1 [file s1]

## Supplementary materials

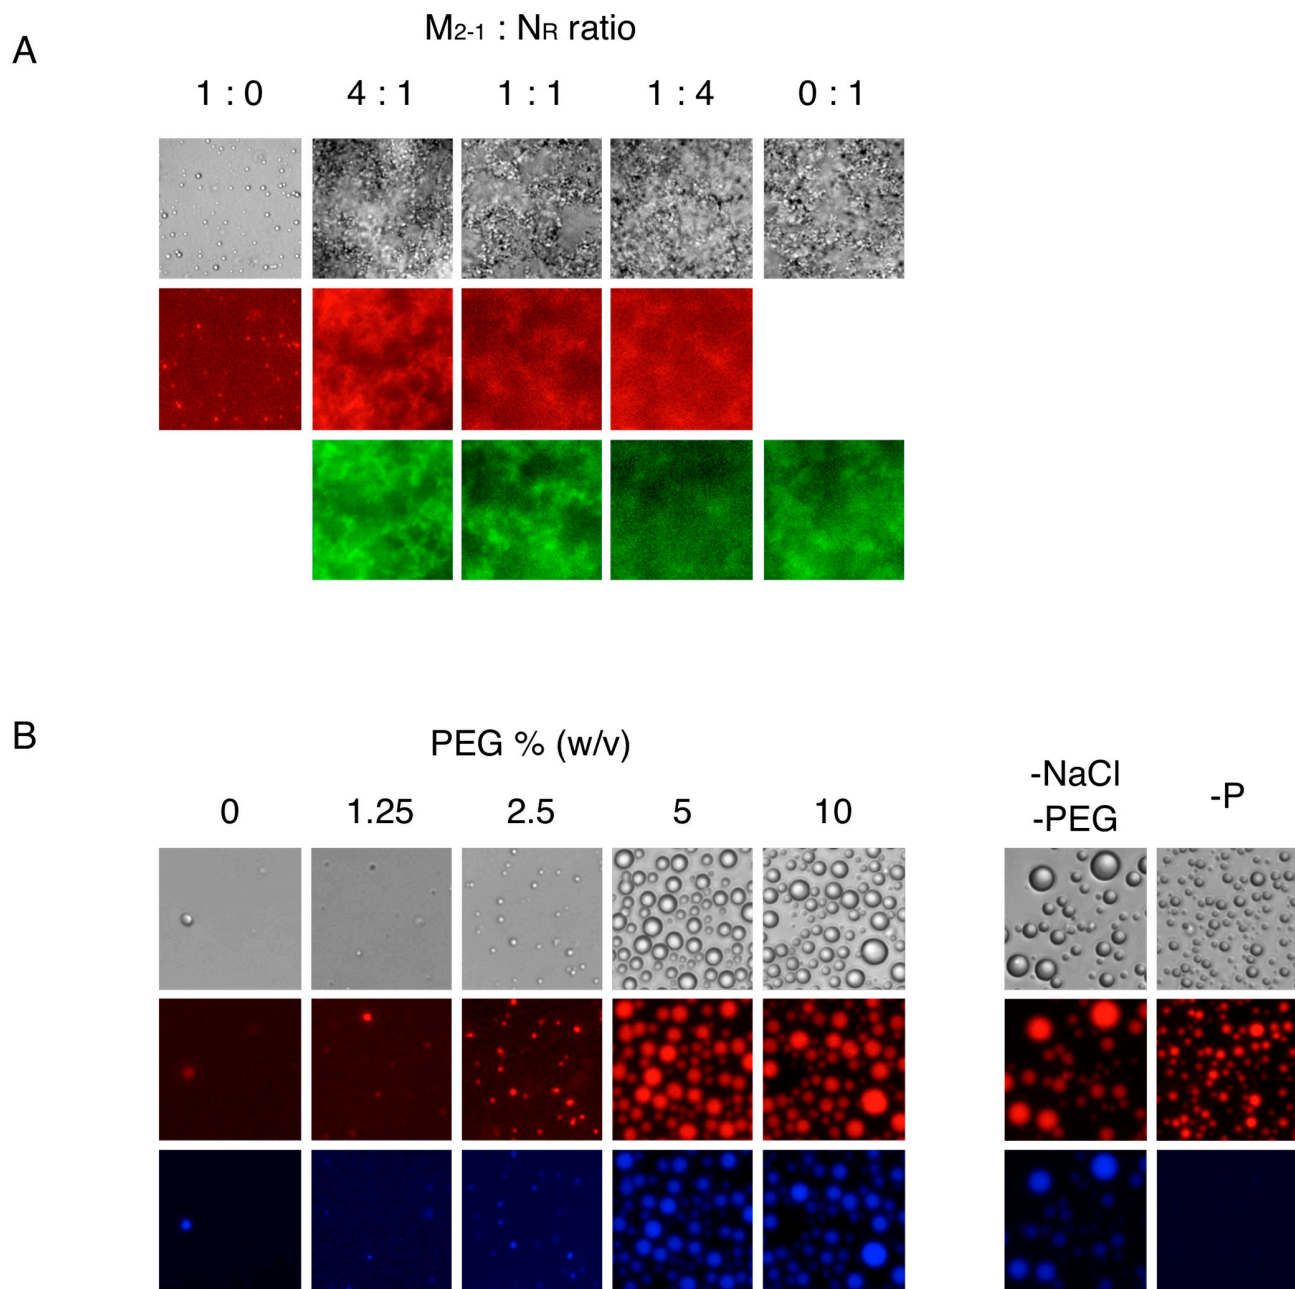

**Figure S1. Heterotypic condensation of  $M_{2-1}$  and P or  $N_R$ .** (A)  $N_R$  and  $M_{2-1}$  were incubated at different ratios with protein concentration ranging from 2.5 to 10  $\mu$ M. (B) Effect of crowding agent on heterotypic LLPS. P and  $M_{2-1}$  at 1:4 ratio were incubated in the presence of increasing concentrations of PEG-4000. -NaCl -PEG, corresponds to heterotypic P- $M_{2-1}$  condensates without NaCl and crowding agent. -P corresponds to homotypic  $M_{2-1}$  condensates with fixed NaCl and PEG-4000.

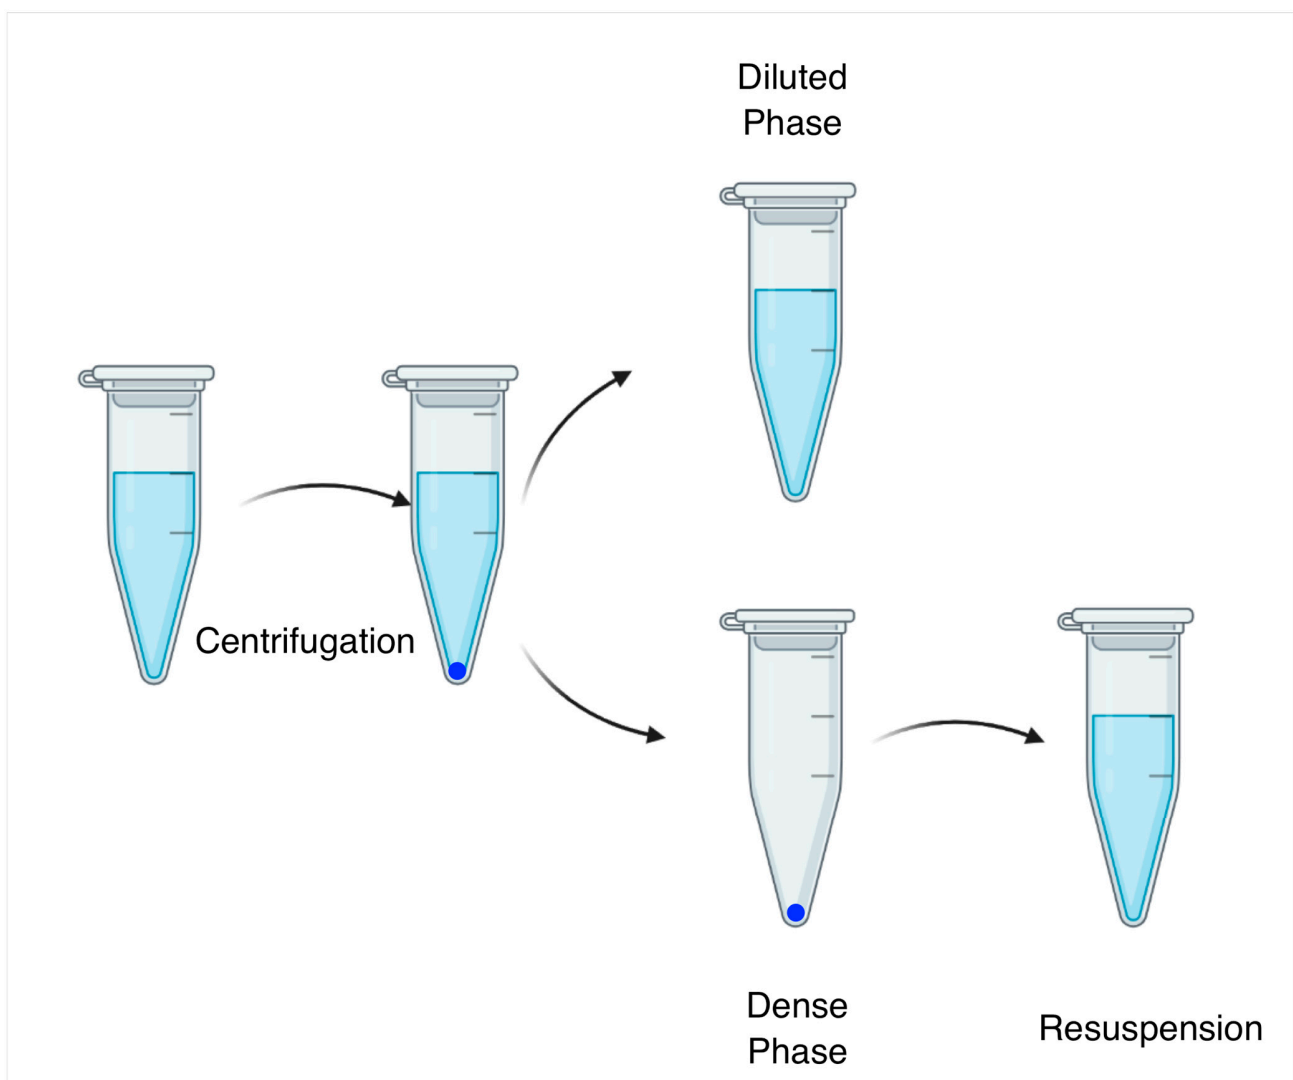

**Figure S2.** Scheme of partition experiment protocol.

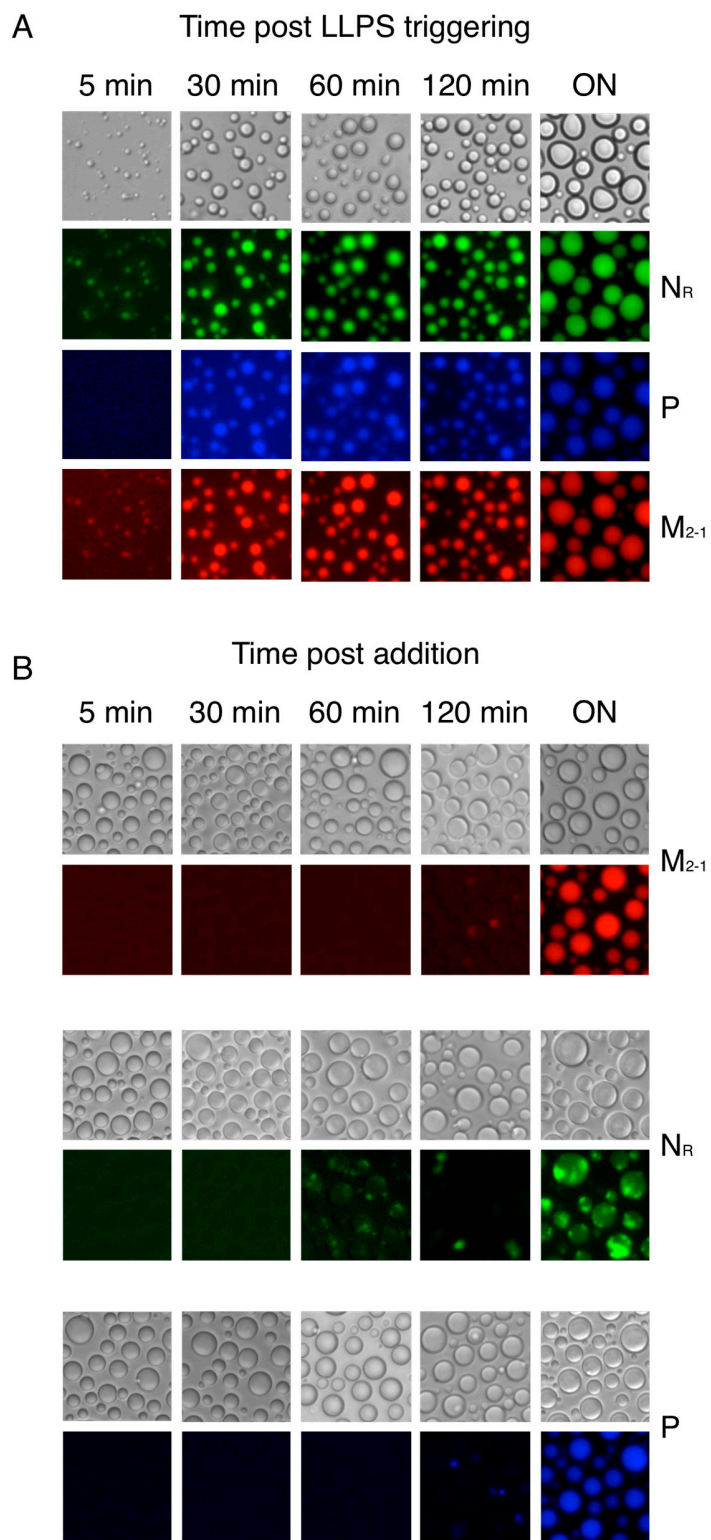

**Figure S3. Tripartite P- $N_R$ - $M_{2-1}$  condensates.** (A) Formation of tripartite heterotypic condensates triggered by  $N_R$ . Preformed P- $M_{2-1}$  soluble complex incubated for 10 min and then  $N_R$  was added. (B) Incorporation of  $M_{2-1}$ -FITC,  $N_R$ -FITC or P-FITC to tripartite condensates of unlabeled P- $N_R$ - $M_{2-1}$ .

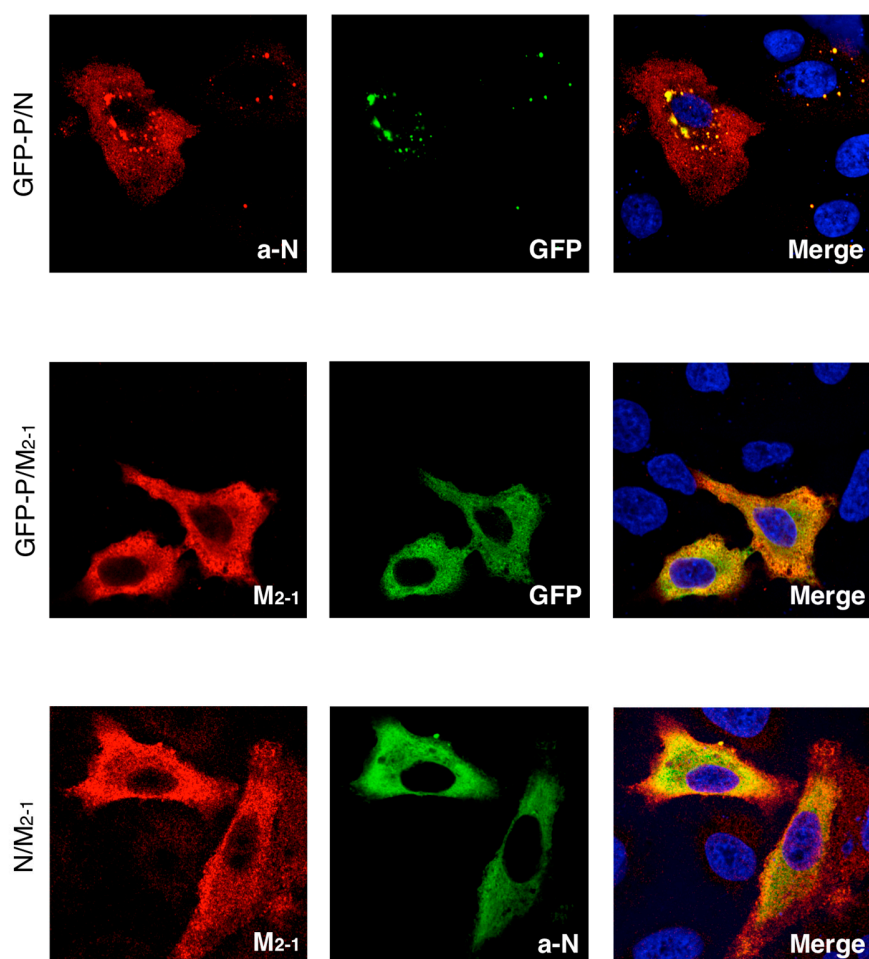

**Figure S4. Co-localization of RSV proteins in transfected cells.** A549 cells were co-transfected in pairs with plasmids encoding GFP-P, M<sub>2-1</sub> and N for 24h as a control. Proteins were detected by fluorescence microscopy labeling by GFP fluorescence or with anti-M<sub>2-1</sub> or anti-N antibodies. Nuclei were stained with DAPI.

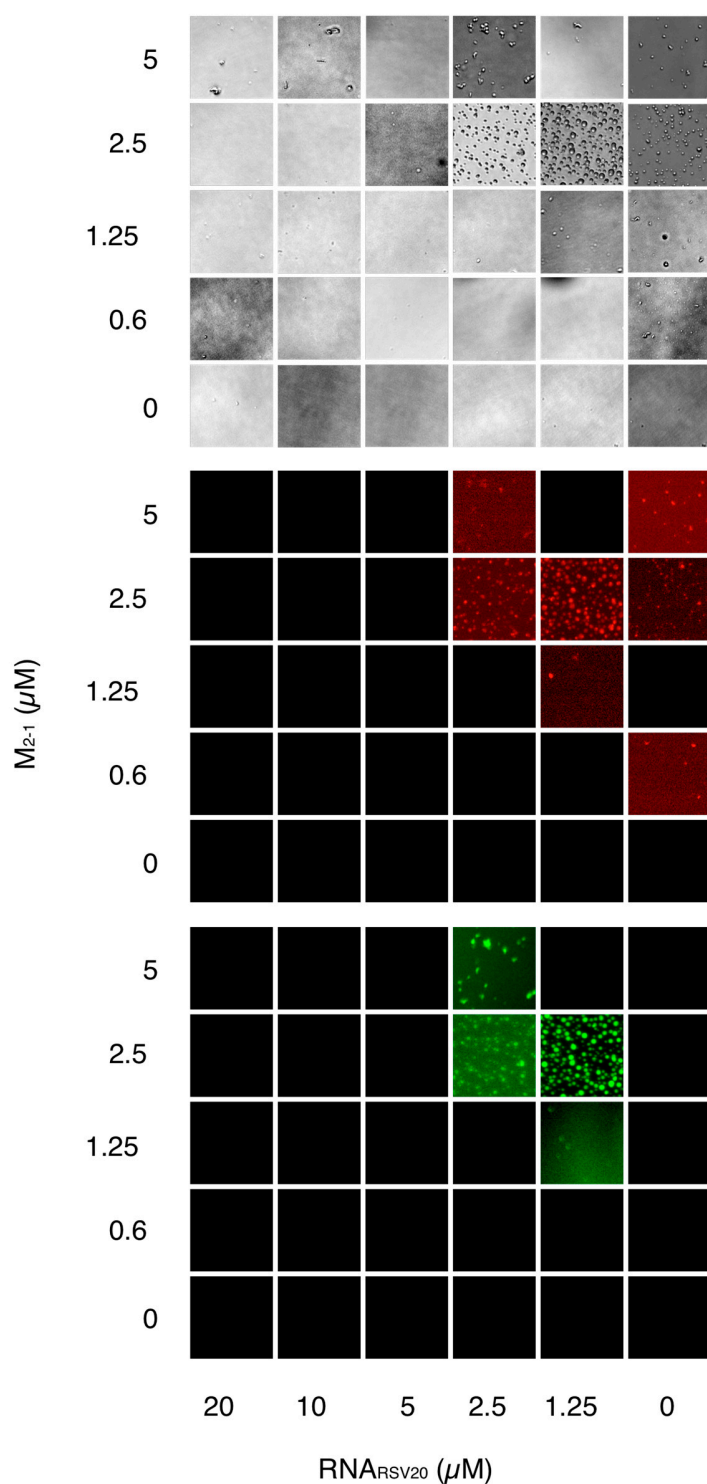

**Figure S5. Grid of heterotypic  $M_{2-1}$ - $RNA_{RSV20}$  condensates.** Different concentrations of  $M_{2-1}$  and  $RSV_{RNA20}$  were visualized by brightfield microscopy (top) and fluorescence microscopy of  $M_{2-1}$ -Cy5 and  $RNA_{RSV20}$ -FITC (middle and bottom, respectively).

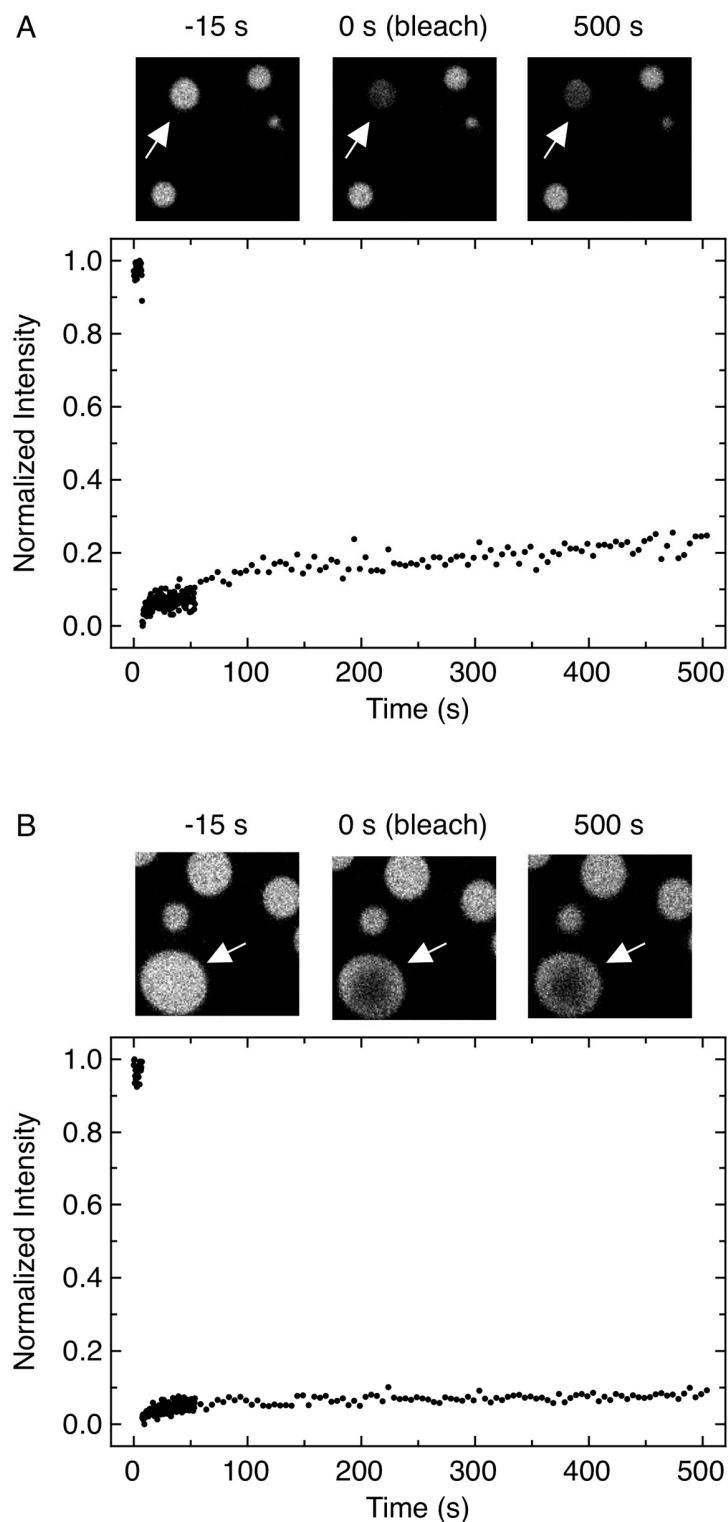

**Figure S6. Fluorescence recovery after photobleaching (FRAP) assays of homotypic  $M_{2-1}$  and heterotypic  $M_{2-1}$ -tRNA<sub>70</sub> condensates.** (A) Representative images and plot of FRAP analysis performed on FITC- $M_{2-1}$  (5  $\mu$ M) homotypic condensates. (B) Representative images and plot of FRAP analysis performed on FITC- $M_{2-1}$  (5  $\mu$ M) and tRNA<sub>70</sub> (300 mM) heterotypic condensates.

**Table S1.** Initial and final (condensed and diluted) protein concentration of heterotypic condensates after partition experiments.

|                                                       | PEG-4000<br>(% w/v) | Initial mix | Concentration ( $\mu\text{M}$ ) <sup>1</sup><br>Dense phase | Diluted phase   |
|-------------------------------------------------------|---------------------|-------------|-------------------------------------------------------------|-----------------|
| P : M <sub>2-1</sub> (4 : 1)                          | 10                  | 10 : 2.5    | 195 : 12                                                    | 6.2 : 2.3       |
| P : M <sub>2-1</sub> (1 : 1)                          | 10                  | 2.5 : 2.5   | 53 : 24                                                     | 1.5 : 2         |
| P : M <sub>2-1</sub> (1 : 4)                          | 10                  | 2.5 : 10    | 70 : 140                                                    | 1.1 : 7         |
| P : N <sub>R</sub> (2.5 : 1)                          | 5                   | 5 : 2       | 98.3 : 81.3                                                 | 3 : 0.4         |
| P : N <sub>R</sub> : M <sub>2-1</sub> (2.5 : 1 : 2.5) | 5                   | 5 : 5 : 2   | 120.92 : 93.38 : 64.58                                      | 2.6 : 0.1 : 3.7 |

<sup>1</sup> Refers to P tetramer, M<sub>2-1</sub> tetramer and N<sub>R</sub> decamer (see text).
